# Supplementary material for: In Vitro and in Vivo Neuroprotective Effects of Walnut (Juglandis Semen) in Models of Parkinson’s Disease
Source: PubMed Central journal article supplement (PMC4730349; doi:10.3390/ijms17010108), 2016-01-15
Supplement: ijms-17-00108-s001.pdf [file ijms-17-00108-s001.pdf]

## Supplementary Materials: *In Vitro* and *in Vivo* Neuroprotective Effects of Walnut (*Juglandis Semen*) in Models of Parkinson's Disease

Jin Gyu Choi, Gunhyuk Park, Hyo Geun Kim, Dal-Seok Oh, Hocheol Kim and Myung Sook Oh

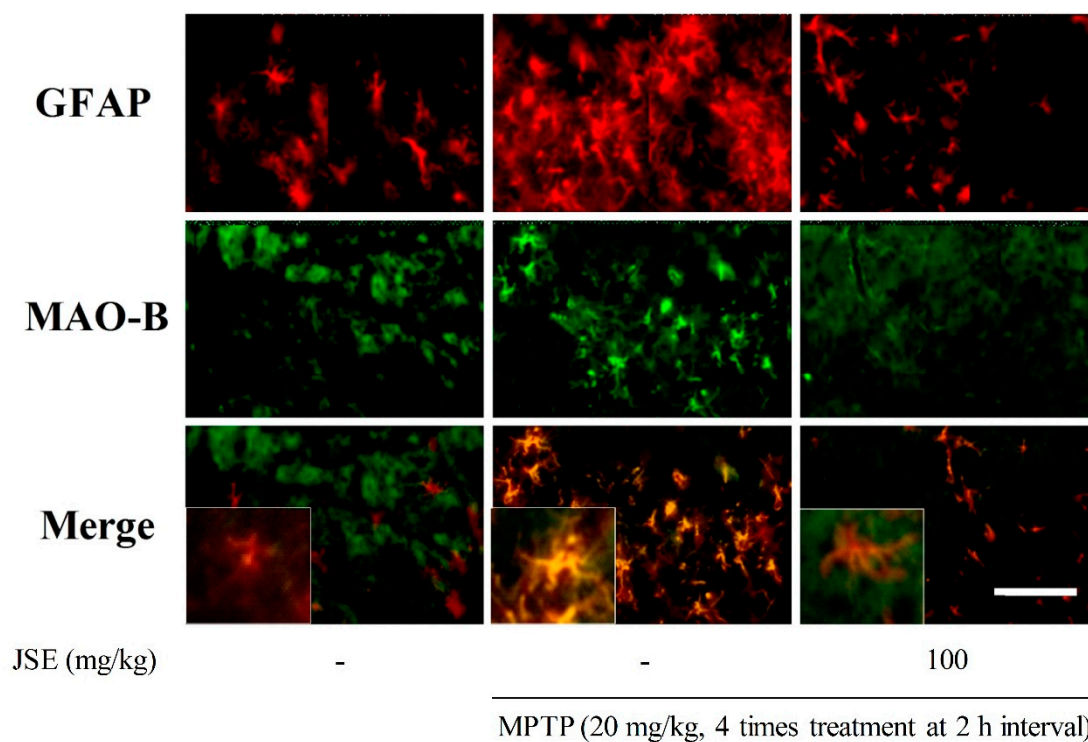

**Figure S1.** Effect of JSE on MPTP-induced glial fibrillary acid protein (GFAP) and monoamine oxidase B (MAO-B) inhibition in the substantia nigra pars compacta of mouse brain using GFAP and MAO-B immunohistochemical co-localization. Scale bar = 150  $\mu$ m.
